# Supplementary material
Source: PubMed Central journal article supplement (PMC3719817)
Supplement: JVI.00899-13_zjv999097903so1.pdf [file JVI.00899-13_zjv999097903so1.pdf]

# 1 Supplementary data

## 2 Supplemental data 1

3

| Target | Type of markers   | Primer name         | Primer sequence (5'—3') | Size of PCR product (bp) |
|--------|-------------------|---------------------|-------------------------|--------------------------|
| eBSGFV | Integration locus | VM1F                | TTGTCCAAAATCTGCTCGTG    | 481                      |
|        |                   | VM1R                | TGTAATTCCTGCTCCTGCAA    |                          |
|        |                   | VM2F                | TTCTCCCTTTTCGATCCGTA    | 374                      |
|        |                   | VM2R                | TTTTGATGCATCTCCAGCAG    |                          |
|        | Structure         | VV1F                | ACAGCTCCAGGAGATTGGAA    | 268                      |
|        |                   | VV1R                | CTGAAGTGTGCCTGTGGAGA    |                          |
|        |                   | VV2F                | TCTGAGATCTCCAGCCAGGT    | 639                      |
|        |                   | VV2R                | GACAGTCCAGCACAGCAGA     |                          |
|        |                   | VV3F                | TTGCCAAGAATTCCTCCAAG    | 376                      |
|        |                   | VV3R                | AAGTCTTGTCGGCAAGGTG     |                          |
|        |                   | VV4F                | GAGCAACACGAGTCAACGAA    | 784                      |
|        |                   | VV4R                | TCTCCACAGGCACACTCAG     |                          |
|        |                   | VV6F                | GCATGAAGCATGACTGGAGA    | 264                      |
|        |                   | VV6R                | AATGCATAAGGGCCTCGAAT    |                          |
|        | Allelic           | VV5F                | CCATGGAGGTTGACCTGTCT    | 628                      |
|        |                   | VV5R                | ACCCCTCTGTCTTCCCAACT    |                          |
|        |                   | DifGfF              | TTGCAGGAGCAGGAATTACA    | 670                      |
|        |                   | DifGfR              | GGATGGAAGATGAGCTCTTTG   |                          |
| eBSOLV | Integration locus | Musa-O1 junction1 F | TGCATTAGATGGTCTGGGAAA   | 563                      |
|        |                   | Musa-O1 junction1 R | ACTTCACGATGCCCATGTTT    |                          |
|        |                   | Musa-O1 junction2 F | GAGCTGTTTCTCCGTGTCT     | 590                      |
|        |                   | Musa-O1 junction2 R | CCTGGAAGAAAGCAGACGAG    |                          |
|        | Structure         | sig1 eBSOLV F       | TTCGAGGAGTCAACGGAGTC    | 606                      |
|        |                   | sig1 eBSOLV R       | CCTGGTCTGCACAGAGATGA    |                          |
|        |                   | sig2 eBSOLV F       | CTTGCTCTGTGGGCAAGACT    | 426                      |
|        |                   | sig2 eBSOLV R       | CCATTTTTCTCGCAGATTGTC   |                          |
|        | Allelic           | Marker1-BSOLV(2) F  | ATACGAAGCCCAACGAATTG    | 601                      |
|        |                   | Marker1-BSOLV(2) R  | ATGGCTTGCCTTCACAGATT    |                          |
|        |                   | Marker2-BSOLV(2) F  | ACTCGCACAAAGTGAACCTCG   | 399                      |
|        |                   | Marker2-BSOLV(2) R  | ACAGTACAAGCCCCACCAAT    |                          |
|        |                   | Marker2-BSOLV(1) F  | GTGGTGGTTCTTGATCCGGT    | 1469                     |
|        |                   | Marker2-BSOLV(1) R  | CACGTGGTAGGGGTCCGCCA    |                          |

|           |                    |                            |     |
|-----------|--------------------|----------------------------|-----|
|           | Dif-OL(F) (HaeIII) | GAATCATTATTCGAGGAGTCAACGG  | 337 |
|           | Dif-OL(R) (HaeIII) | CGAGTAGAGCGCAAGATCCTAGTTC  |     |
|           | Dif-OL (F) (AhdI)  | TTGGAACAAGACAGATTGACTTCCT  | 500 |
|           | Dif-OL (R) (AhdI)  | GGTTCGTTTTTATGGCTTTCATGG   |     |
|           | Musa/F2-F          | ACTCAGCAAAGGCAAGCAGT       | 561 |
|           | Musa/F2-R          | TCTGGTGTGAGTTTTAATAATACCG  |     |
|           | F5/Musa-F          | GTATGGTTCTTGCCCCGATGA      | 594 |
|           | F5/Musa-R          | TCGTGCAGACCCCTACTCT        |     |
| eBSImV    | F1/F3-F            | TTCGGTATTATTAATAACTCACACCA | 490 |
|           | F1/F3-R            | GCTGCTAACTGAGGATAATCGAA    |     |
| Structure | F3/F4-F            | TCCCACGCAAGCTTACTTCT       | 600 |
|           | F3/F4-R            | GAAGCTGTCCAAGCCTATATCA     |     |
|           | F4/F5-F            | TGGACAGCTTCTGGTGTGAG       | 540 |
|           | F4/F5-R            | AGCAGCTACAACCCTGGAGA       |     |

4

5 **For eBSGFV:**

6 Primers DifGfF and DifGfR (annealing temperature  $Ta=60^{\circ}\text{C}$ ) amplify a PCR product of 670 bp. This  
7 PCR product was digested with the restriction enzyme *TaaI* (Fermentas) in a final volume of 20  $\mu\text{l}$   
8 according to the manufacturer's instructions. Digested DNA was loaded onto a 2.5% agarose gel  
9 stained with ethidium bromide, and the bands visualized under UV light. Digestion of the PCR product  
10 obtained from eBSGFV9 and eBSGFV7 yields two (442 bp + 227 bp) and three (366 bp + 227 bp + 76  
11 bp) bands, respectively.

12 The second set of primers (VV5F/VV5R,  $Ta=60^{\circ}\text{C}$ ) hybridizes with eBSGFV9 only and yields a 628-  
13 bp amplification product.

14

15 **For eBSOLV:**

16 Primers Marker1-BSOLV(2) F/Marker1-BSOLV(2) R and Marker2-BSOLV(2) F/Marker2-BSOLV(2)  
17 R ( $Ta=65^{\circ}\text{C}$ ) hybridize with eBSOLV2 only and yield amplification products of 601-bp and a 399-bp,  
18 respectively.

19 The third set (Marker2-BSOLV(1) F/ Marker2-BSOLV(1) R ( $Ta=65^{\circ}\text{C}$ ) hybridizes with eBSOLV1  
20 only and yields a 1469-bp amplification product.

21 Primers Dif-OL(F) (HaeIII) and Dif-OL(R) (HaeIII) ( $Ta=65^{\circ}\text{C}$ ) amplify a PCR product of 337 bp. This  
22 PCR product was digested with the restriction enzyme *HaeIII* (New England Biolabs) in a final  
23 volume of 20  $\mu\text{l}$  according to the manufacturer's instructions. Digested DNA was loaded onto a 2.5%  
24 agarose gel stained with ethidium bromide, and the bands visualized under UV light. The PCR product

25 obtained from eBSOLV2 was not digested and that from eBSOLV1 was cut into two bands of 83 and  
26 254 bp.

27 Primers Dif-OL (F) (AhdI) and Dif-OL (R) (AhdI) ( $T_a=65^\circ\text{C}$ ) amplify a PCR product of 500 bp. This  
28 PCR product was digested with the restriction enzyme *AhdI* (New England Biolabs) in a final volume  
29 of 20  $\mu\text{l}$  according to the manufacturer's instructions. Digested DNA was loaded onto a 1.5% agarose  
30 gel stained with ethidium bromide, and the bands visualized under UV light. The PCR product  
31 obtained from eBSOLV1 was not digested and that from eBSOLV2 was cut into two bands of 202 and  
32 298 bp.

33

#### 34 **For eBSImV:**

35 12 SSR markers defined from the BAC sequence (MBP\_68C24) according to the procedure described  
36 in the paragraph "eBSV genotyping" were tested on parent *M. balbisiana* PKW in order to check  
37 polymorphism for subsequent segregation analysis.

38 Moreover, two dCaps markers were developed from the BAC sequence (MBP\_68C24) and tested on  
39 the 23 other BAC clones that hybridized with BSImV probes during the BAC library screening in  
40 order to identify a second eBSImV allele. The markers were developed based on point mutations  
41 located at position 4,091 and 11,845 of eBSImV, which lead to stop codons. Both point mutations are  
42 present in the ORF3 fragment of eBSImV. Primers EPRV-Im 4091 For [5'-AGA AGA ATG AAT AGT  
43 CAA GAT TGG AAG ATT GTA CCA T-3'] and EPRV-Im 4091 Rev [5'-GCT TTG CCT TCC ATT  
44 TGC AAA-3'] amplify a 158 bp fragment whereas primers EPRV-Im11845 For 2 [5'-AGC CCC ACA  
45 TCA TCA AGA AG-3'] and EPRV-Im11845 Rev 2 [5'-ACC TGA GTT TTG ATG TTT TGT ACA  
46 ATC CA-3'] amplify a fragment of 217 bp. Both PCRs are performed as described in paragraph "PCR"  
47 in the Materials and Methods sections at a  $T_a$  of  $60^\circ\text{C}$  for 35 cycles and PCR product are digested with  
48 the restriction enzyme *BccI* (New England Biolabs) in a final volume of 20  $\mu\text{l}$  according to the  
49 manufacturer's instructions. Digested DNA was loaded onto a 3% agarose gel stained with ethidium  
50 bromide, and the bands were visualized under UV light. Digestion of the PCR products yielded two  
51 bands (116 bp + 42 bp) and (183 bp + 34 bp) for EPRV-Im 4091 and EPRV-Im 11845, respectively.

52

## 53 **Supplemental data 2**

54 Estimates of evolutionary divergence between sequences of eBSVs found in PKW.  
55 For each eBSV species, pairwise distances were computed separately for each virus component  
56 (ORF3, IG, ORF1 and ORF2). In the data matrix, the number of base differences per site between  
57 sequences is shown. For each virus component, we calculated the average divergence within the

58 sequence of each allele, between the two alleles and finally between BSV and eBSV sequences (Excel  
59 spreadsheet). Overall divergences deduced from these data are listed in Table 5.

60

61

62

63
